# Supplementary material for: Dopamine-modified magnetic graphene oxide as a recoverable sorbent for the preconcentration of metal ions by an effervescence-assisted dispersive micro solid-phase extraction procedure
Source: Royal Society of Chemistry journal article supplement (doi:10.1039/d0ay00522c), 2020-01-01
Supplement: d0ay00522c1.pdf [file d0ay00522c1.pdf]

**Dopamine modified on magnetic graphene oxide as a recoverable absorbent for preconcentration of metal ions by an  
effervescent-assisted dispersive micro solid-phase extraction procedure**

Basira Karbalaie, Maryam Rajabi and Bahareh Fahimirad

Department of Chemistry, Semnan University, Semnan, Iran

\*Corresponding author:

Maryam Rajabi

Department of Chemistry, Semnan University, Semnan 35195-363, Iran

E-mail address: [mrajabi@semnan.ac.ir](mailto:mrajabi@semnan.ac.ir)

Fax: +98-23-33654110

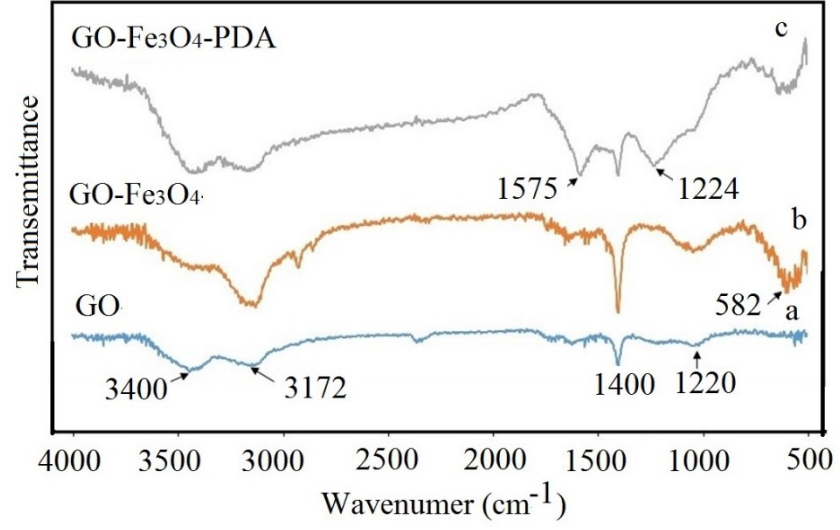

Fig. 1S. FT-IR spectra of GO, GO-Fe<sub>3</sub>O<sub>4</sub> and GO-Fe<sub>3</sub>O<sub>4</sub>-DA

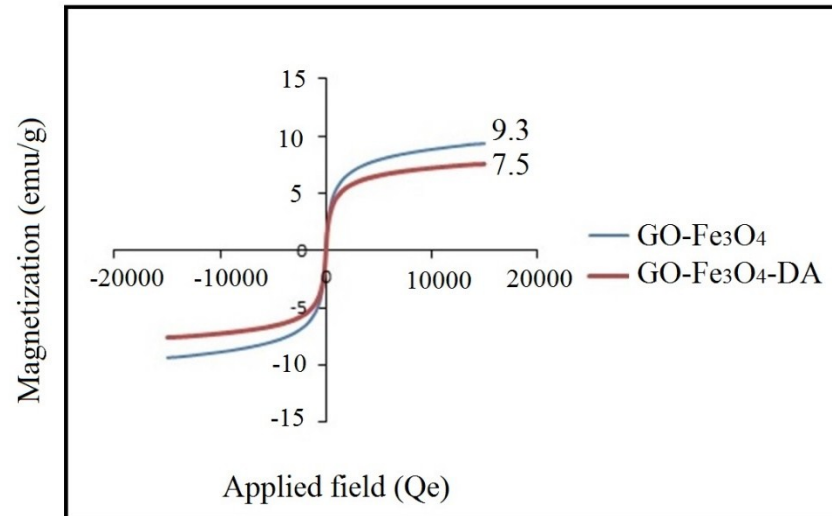

Fig. 2S. Magnetic hysteresis loops of GO-Fe<sub>3</sub>O<sub>4</sub> and GO-Fe<sub>3</sub>O<sub>4</sub>-DA

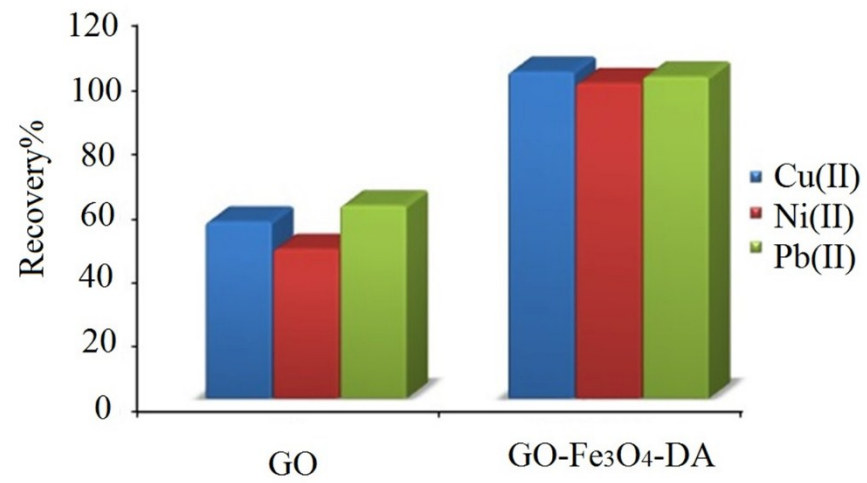

Fig. 3S Comparison of the adsorbents

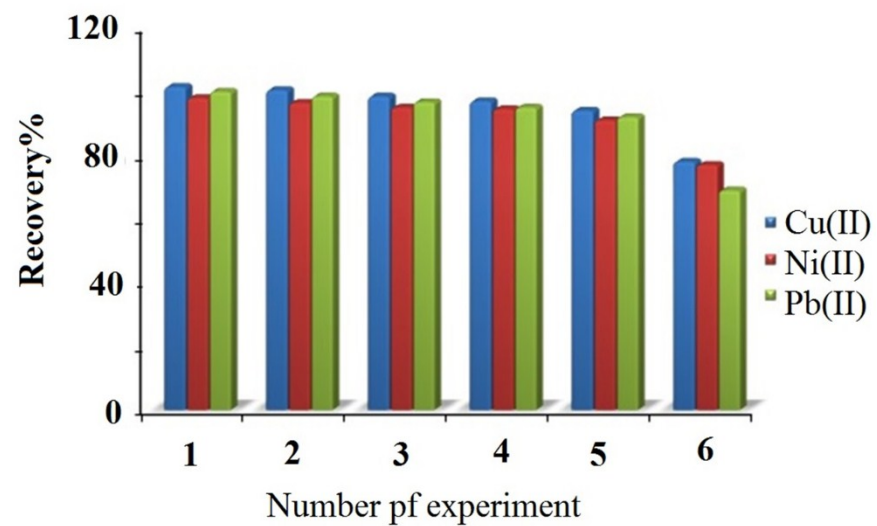

Fig. 4S Results acquired from repeated usage of GO-Fe<sub>3</sub>O<sub>4</sub>-DA after cyclic regeneration.

Table 1S. Influence of potentially interfering ions on recovery of metal ions.

(Conditions: 10 mg of adsorbent, pH 8. Desorption conditions: 300  $\mu$ L of HNO<sub>3</sub> with concentration of 3 mol L<sup>-1</sup>.)

| <b>Ions</b>            | Limit concentration                                          |        |        |
|------------------------|--------------------------------------------------------------|--------|--------|
|                        | (Interfering ion concentration / analyte ion concentration ) |        |        |
|                        | Pb(II)                                                       | Cu(II) | Ni(II) |
| <b>Mg<sup>2+</sup></b> | 1000                                                         | 1000   | 1000   |
| <b>Mn<sup>2+</sup></b> | 900                                                          | 800    | 900    |
| <b>Zn<sup>2+</sup></b> | 800                                                          | 900    | 900    |
| <b>NH<sup>4+</sup></b> | 1000                                                         | 800    | 1000   |

|                                    |      |      |      |
|------------------------------------|------|------|------|
| <b>Al<sup>3+</sup></b>             | 1000 | 1000 | 900  |
| <b>Na<sup>+</sup></b>              | 1000 | 1000 | 1000 |
| <b>Ba<sup>+</sup></b>              | 1000 | 1000 | 1000 |
| <b>SO<sub>4</sub><sup>2-</sup></b> | 1000 | 1000 | 1000 |

---
